# Supplementary material
Source: HighWire-hosted journal article supplement (https://ejhp.bmj.com/highwire/filestream/150629/field_highwire_adjunct_files/5/ejhpharm-2021-002803supp006_data_supplement.pdf)
Supplement: ejhpharm-2021-002803supp006_data_supplement.pdf [file ejhpharm-2021-002803supp006_data_supplement.pdf]

**Supplemental Table 1** Characteristics of eligible studies

|                     | Name of trial              | Histology | Experiment                                           |        |     |               | Control                             |        |     |               | HR for OS       | HR for PFS      |
|---------------------|----------------------------|-----------|------------------------------------------------------|--------|-----|---------------|-------------------------------------|--------|-----|---------------|-----------------|-----------------|
|                     |                            |           | Drug                                                 | number | ORR | Grade 3-4 AES | Drug                                | number | ORR | Grade 3-4 AES |                 |                 |
| Planchard D 2020    | ARCTIC (NCT02352948)       | NSCLC     | durvalumab 20 mg/kg + tremelimumab 1 mg/kg           | 174    | 26  | 42.8%         | gemcitabine/erlotinib               | 118    | 8   | 51.8%         | 0.8(0.61,1.05)  | 0.77(0.59,1.01) |
| Hellmann MD 2018    | Checkmate227(NCT02477826)  | NSCLC     | nivolumab 3 mg/kg q2w + ipilimumab 1 mg/kg           | 139    | 63  | 31.2%         | platinum-based chemotherapy         | 160    | 43  | 36.1%         | /               | 0.58(0.41,0.81) |
| Rizvi NA 2020       | MYSTIC(NCT02453282)        | NSCLC     | durvalumab 20 mg/kg + tremelimumab 1 mg/kg           | 163    | 56  | 22.9%         | platinum-based doublet chemotherapy | 162    | 61  | 33.8%         | 0.85(0.61,1.17) | 1.05(0.72,1.53) |
| Reck M 2020         | CheckMate 9LA              | NSCLC     | nivolumab 360 mg + ipilimumab 1 mg/kg + chemotherapy | 361    | 137 | /             | platinum-based doublet chemotherapy | 358    | 89  | /             | 0.66(0.55,0.80) | 0.68(0.57,0.82) |
| Antonia SJ (1) 2016 | Checkmate032 (NCT01928394) | SCLC      | nivolumab 1 mg/kg + ipilimumab 3 mg/kg               | 61     | 14  | 30%           | nivolumab 3 mg/kg                   | 49     | 5   | 13%           | /               | /               |
| Antonia SJ (2) 2016 | Checkmate032(NCT01928394)  | SCLC      | nivolumab 3 mg/kg + ipilimumab 1 mg/kg               | 54     | 10  | 19%           | nivolumab 3 mg/kg                   | 49     | 5   | 13%           | /               | /               |

Abbreviations: ORR, Overall response rate; AES, adverse events; HR, hazard ratios; OS, Overall

survival; PFS, Progression-free survival.
